# Supplementary material
Source: publisher figshare collection journal article supplement (https://aacr.figshare.com/articles/dataset/_/22433346)
Supplement: Supplementary file 1 [file 39879783]

## SUPPLEMENTARY INFORMATION

# **Sensitive Detection and Tracking of Spontaneous Metastases in Deep Tissues via a Genetically Encoded Magnetic Resonance Imaging Reporter**

Nivin N. Nyström<sup>1,2</sup>, Sean W. McRae<sup>1,3</sup>, Francisco M. Martinez<sup>3</sup>, John J. Kelly<sup>3</sup>, Timothy J. Scholl<sup>1,3,4,5,#</sup>, John A. Ronald<sup>\*,1,3,6,#</sup>

<sup>1</sup>Department of Medical Biophysics, Western University, London, ON, Canada

<sup>2</sup>Department of Chemical Engineering, California Institute of Technology, Pasadena, CA, USA

<sup>3</sup>Imaging Laboratories, Robarts Research Institute, Western University, London, ON, Canada

<sup>4</sup>Department of Physics and Astronomy, Western University, London, ON, Canada

<sup>5</sup>Ontario Institute for Cancer Research, Toronto, ON, Canada

<sup>6</sup>Lawson Health Research Institute, London, ON, Canada

#These are co-senior authors.

\*Correspondence can be addressed to T.J.S. ([tscholl@robarts.ca](mailto:tscholl@robarts.ca)) and J.A.R. ([jronald@robarts.ca](mailto:jronald@robarts.ca)).

| Reference                                  | Genetic Construct                                            | Field    | Gd(III) Dose       | Performance                                                                  |
|--------------------------------------------|--------------------------------------------------------------|----------|--------------------|------------------------------------------------------------------------------|
| Patrick et al. <i>PNAS</i> (2014)          | Doxycycline-inducible Oatp1a1 lentivirus transfer plasmid    | 7T, 9.4T | 0.664 to 2 mmol/kg | 7.8-fold greater signals than control xenograft at highest dose of 2 mmol/kg |
| Wu et al. <i>FASEB</i> (2018)              | Constitutively expressed Oatp1b3 lentivirus transfer plasmid | 7T       | ~2 mmol/kg*        | 2.7-fold greater signals than control xenografts                             |
| Nyström et al. <i>Invest Radiol</i> (2019) | Constitutively expressed Oatp1a1 lentivirus transfer plasmid | 3T       | 0.1 mmol/kg        | 2.6-fold greater signals than control tumors                                 |
| Kelly et al. <i>Sci Adv</i> (2021)         | Constitutively expressed Oatp1a1 CRISPR-Cas9 knock-in        | 3T       | 1.67 mmol/kg       | 2.9-fold greater signals than control xenografts                             |

**Table S1.** Summary of *Oatp1*-MRI *in vivo* imaging publications, with information on genetic construct design, field strength, and Gd-EOB-DTPA dose. \*Calculated from a reported administration of 200  $\mu$ l of 250 mM Gd-EOB-DTPA per mouse, assuming an average weight of 25 g per mouse.

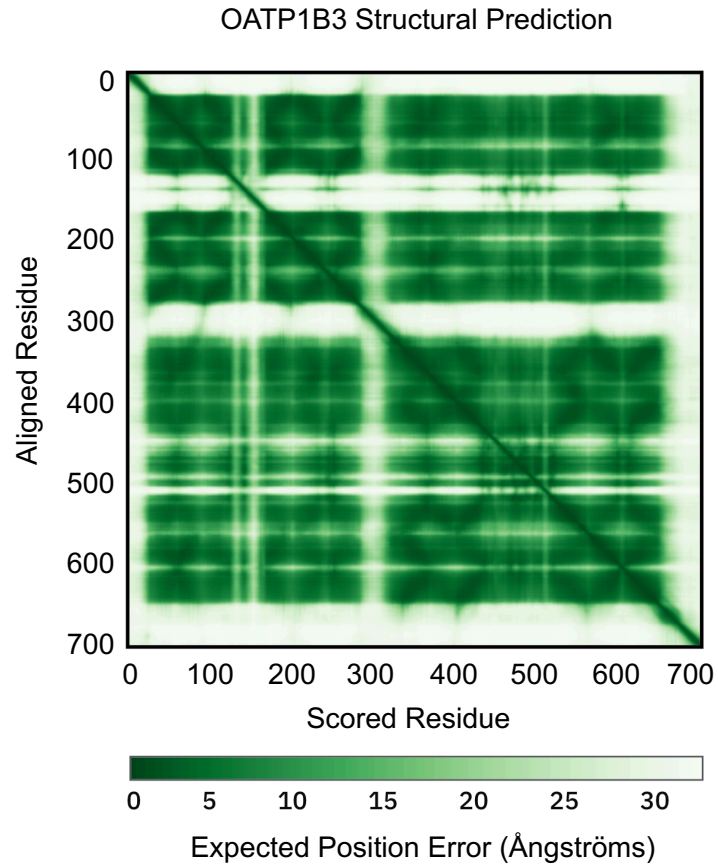

**Figure S1.** Predicted aligned error plot for OATP1B3, where expected position error for the aligned residue is assigned an expected position error (Ångströms) against the rest of the protein sequence. The transmembrane domains of OATP1B3 exhibit low expected position error ( $<5 \text{ \AA}$ ) whereas high expected position error ( $>25 \text{ \AA}$ ) is demonstrated at both termini, Extracellular Domain 2 (ECD2) and Cytoplasmic Domain 4 (CD4).

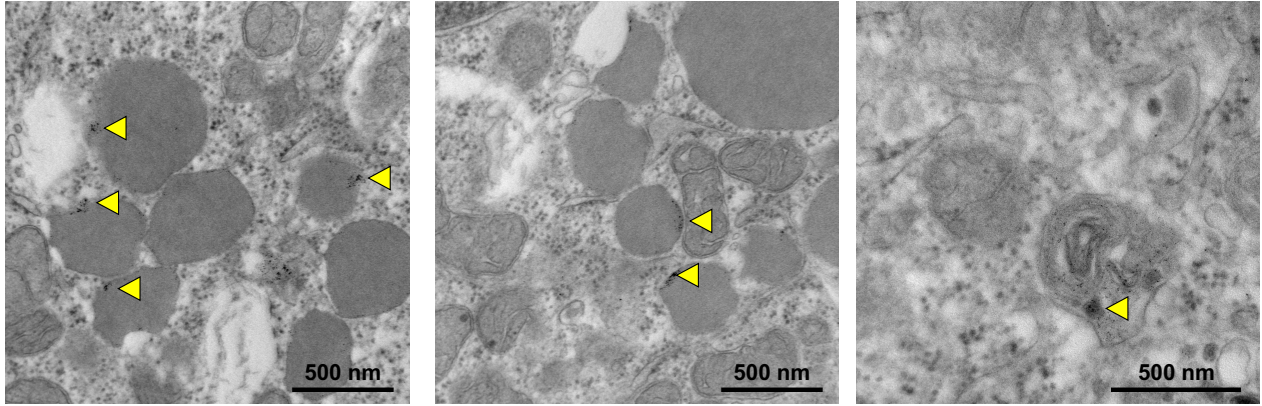

**Figure S2.** Transmission electron microscopy of Luc-1B3 cells incubated with 1 mM Gd-EOB-DTPA (appearing as black foci in TEM images, highlighted by yellow arrows) for 1 hour. Gd(III) is shown to be encapsulated in residual bodies, which are typically destined for exocytosis. Scale bar, 500 nm.

| Glycosylation Sites | Phosphorylation Sites | Disulfide Bonds | Kazal 1-like Domain |
|---------------------|-----------------------|-----------------|---------------------|
| 134                 | 293                   | 459 ↔ 489       | 453-508*            |
| 145                 | 295                   | 465 ↔ 485       |                     |
| 151                 | 683                   | 474 ↔ 506       |                     |
| 445                 |                       |                 |                     |
| 503                 |                       |                 |                     |
| 516                 |                       |                 |                     |

**Table S2. Predicted post-translational regulatory positions of OATP1B3.** N-linked glycosylation to asparagine residues, which has been correlated to promotion of transporter function (31). Phosphorylation of serine residues has been correlated to downregulation of transporter activity (29). Disulfide bonds within the Kazal-1 like domain are predicted to result in serine protease inhibitor activity.

## Nuclear Magnetic Relaxation Dispersion Profiles of Contrast Agents in Serum

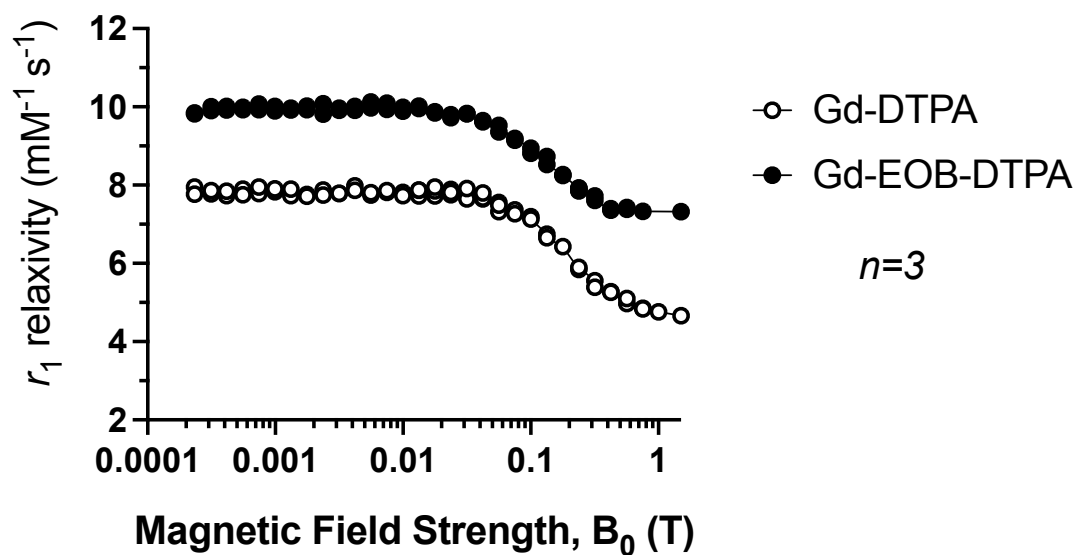

**Figure S3.** Nuclear magnetic relaxation dispersion (NMRD) profiles of Gd-DTPA and Gd-EOB-DTPA measured at 37°C. NMRD data for fields <1 T were acquired using a fast field-cycling relaxometer and extended by an inversion-recovery measurement at 1.5T on a clinical MRI system. (Measurement uncertainty < 1%.)

### Gd-EOB-DTPA Efflux in Mammalian Cells

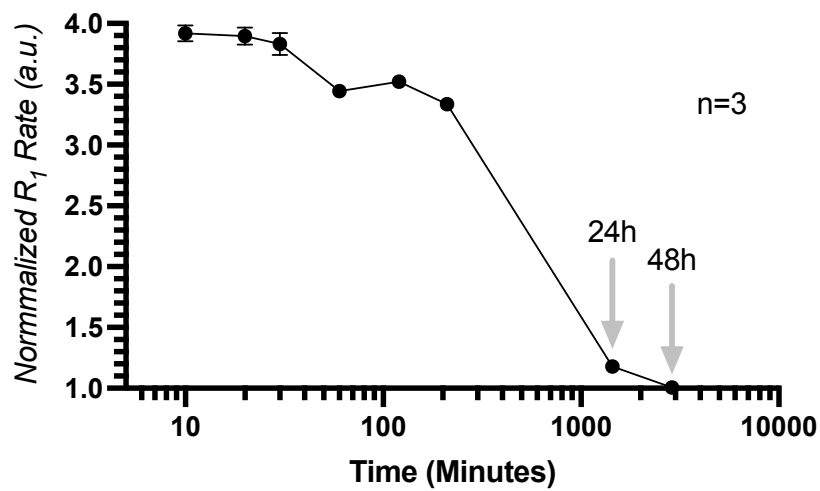

**Figure S4.**  $R_1$  relaxation rates of Luc-1B3 cells normalized to Luc-CTL cells (a.u.), measured at time,  $t$  following 90-minute incubation with 1.6 mM Gd-EOB-TPA and immediate wash with PBS. Measurements were acquired at 37°C, 10 minutes to 48 hours post-incubation. Error bars represent standard deviation. Some error bars are too small to represent on plot.

### $T_1$ -weighted 3T MRI

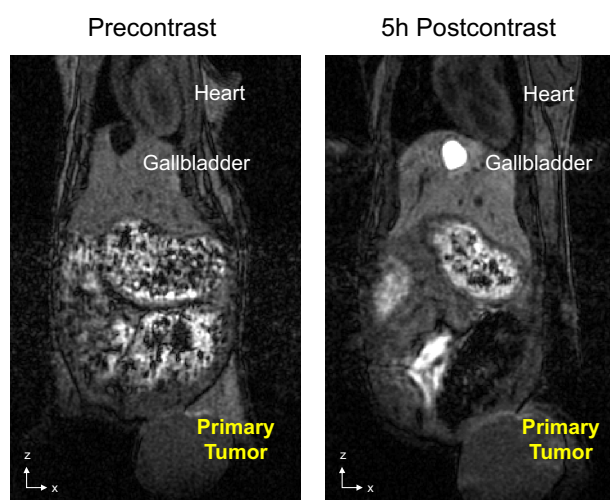

**Figure S5.** Pre-contrast and post-contrast (1.3-mmol/kg Gd-EOB-DTPA)  $T_1$ -weighted images acquired at 3T of a representative Luc-CTL mouse on day 12.



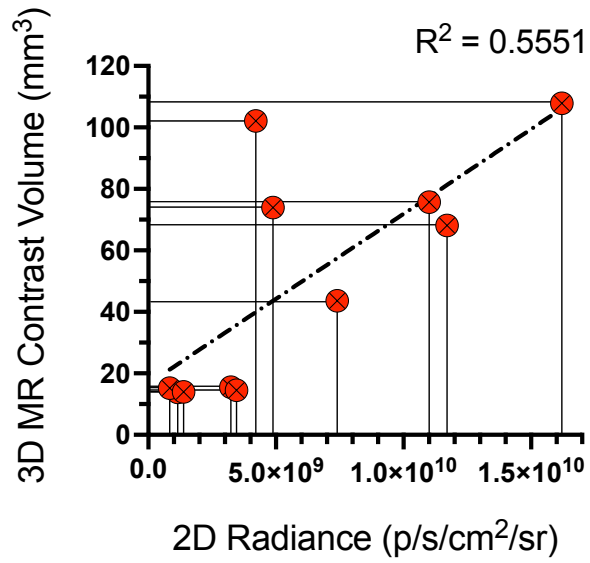

**Figure S6.** Correlation of 2D Radiance (p/s/cm<sup>2</sup>/sr) measured from primary tumors on Day 12 *versus* 3D MRI contrast-enhanced volume of the same primary tumors at the same timepoint.

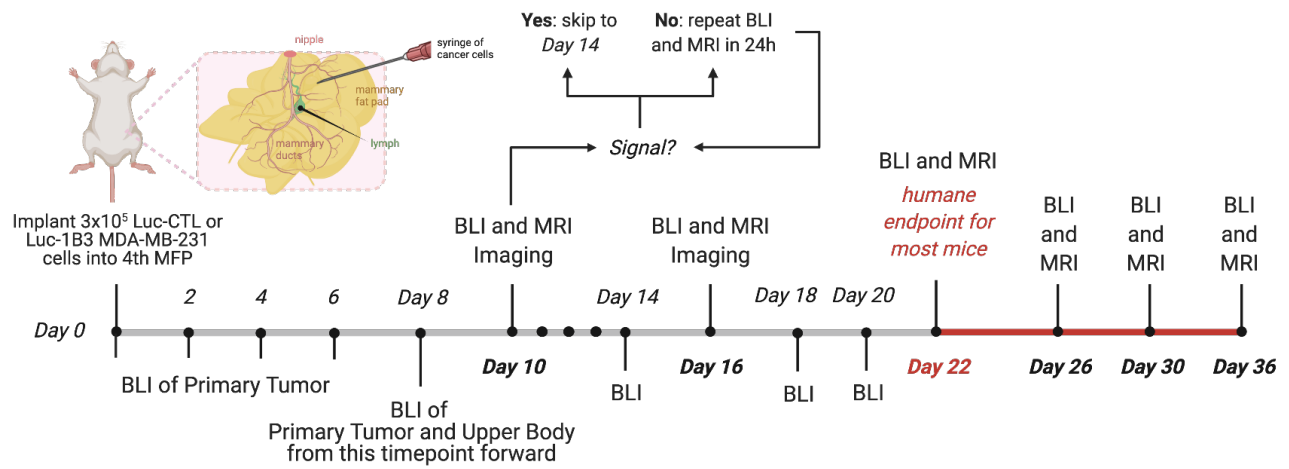

**Figure S7.** Timeline of metastasis and imaging protocol. Mammary fat pad, MFP. Bioluminescence imaging, BLI.  $T_1$ -weighted magnetic resonance imaging at 3T, MRI.

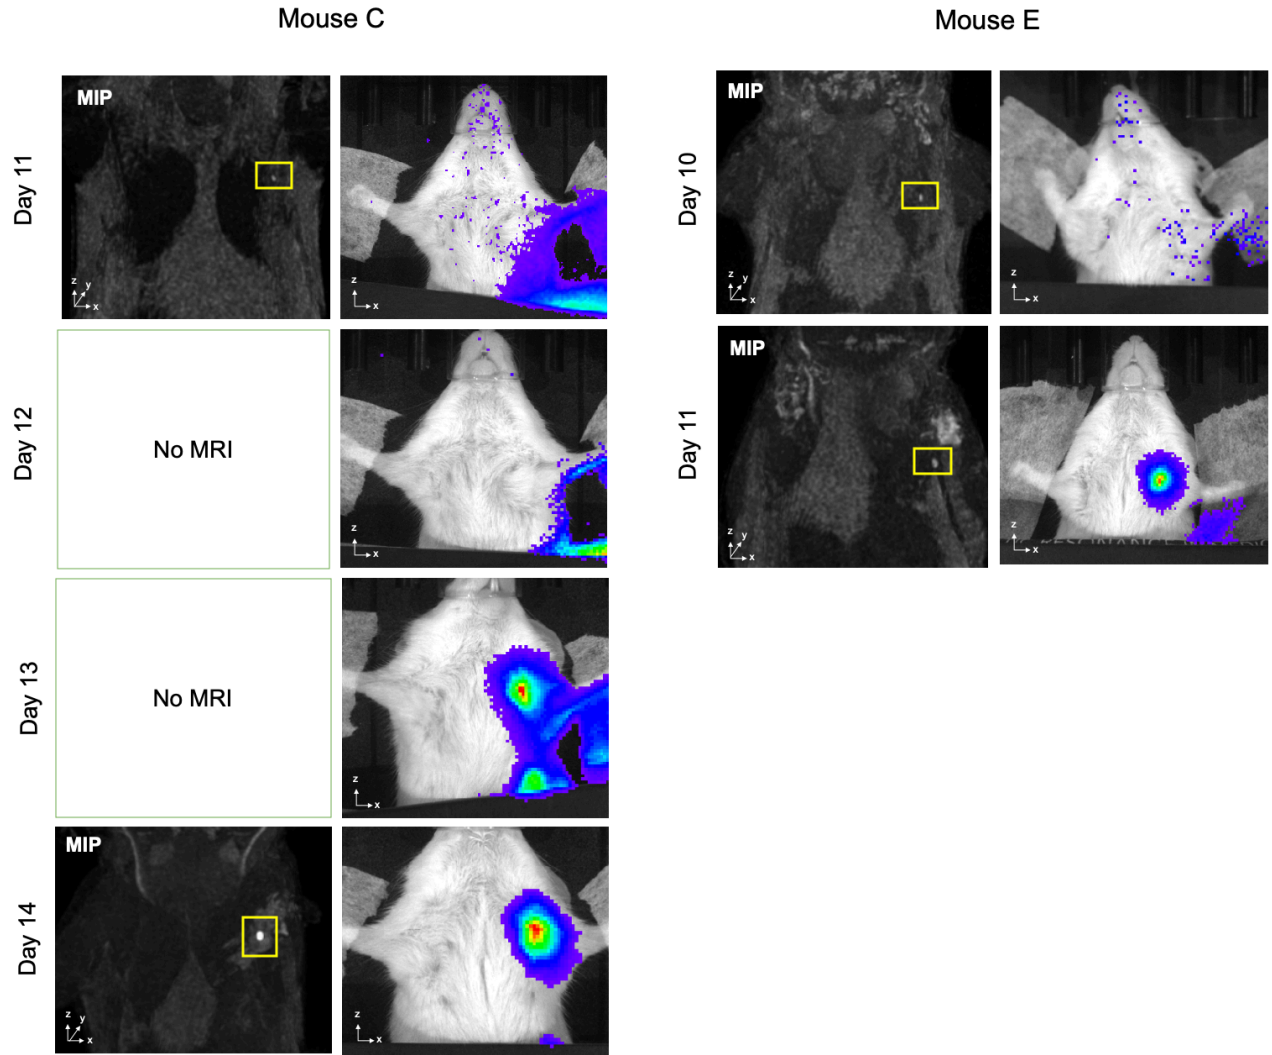

**Figure S8.** Bioluminescence images (BLI) and post-contrast (1.3 mmol/kg Gd-EOB-DTPA)  $T_1$ -weighted images acquired at 3T of two mice, whereby detection of initial metastasis at the ipsilateral axillary lymph node was detected with MRI prior to detection with BLI.
